# Supplementary material for: NCI60 Cancer Cell Line Panel Data and RNAi Analysis Help Identify EAF2 as a Modulator of Simvastatin and Lovastatin Response in HCT-116 Cells
Source: PubMed Central journal article supplement (PMC3070731; doi:10.1371/journal.pone.0018306), 2011-04-04
Supplement: pone.0018306.s001.pdf [file pone.0018306.s001.pdf]

**Supplementary Table S1: List of sensitive and resistant NCI60 cell lines for Simvastatin.**

| Sensitive     |              |          |              | Resistant     |              |          |              |
|---------------|--------------|----------|--------------|---------------|--------------|----------|--------------|
| CellPanelName | CellLineName | logValue | Normalized   | CellPanelName | CellLineName | logValue | Normalized   |
| NSCL          | HOP-92       | -8.523   | -4.162785640 | SCL           | *DMS273      | -5.540   | -0.199477124 |
| Renal         | ACHN         | -6.350   | -1.275668843 | Leukemia      | HL-60(TB)    | -5.522   | -0.175561752 |
| Melanoma      | UACC-62      | -6.329   | -1.247767576 | Colon         | HCT-116      | -5.485   | -0.126402378 |
| Melanoma      | SK-MEL-2     | -6.283   | -1.186650516 | Renal         | UO-31        | -5.429   | -0.051999000 |
| Renal         | *RXF-631     | -6.260   | -1.156091985 | Renal         | CAKI-1       | -5.395   | -0.006825520 |
| Ovarian       | IGROV1       | -6.189   | -1.061759131 | NSCL          | A549/ATCC    | -5.237   | 0.203098297  |
| CNS           | SNB-75       | -6.182   | -1.052458709 | NSCL          | *LXFL529     | -5.176   | 0.284144834  |
| CNS           | U251         | -6.116   | -0.964769013 | Colon         | HT29         | -5.164   | 0.300088415  |
| Renal         | *RXF393      | -6.091   | -0.931553219 | Leukemia      | RPMI-8226    | -5.086   | 0.403721691  |
| Renal         | A498         | -6.046   | -0.871764790 | Colon         | KM12         | -5.073   | 0.420993904  |
| NSCL          | EKVX         | -6.023   | -0.841206260 | CNS           | SF-539       | -5.045   | 0.458195593  |
| NSCL          | NCI-H23      | -6.008   | -0.821276784 | NSCL          | NCI-H460     | -5.042   | 0.462181488  |
| Colon         | HCT-15       | -5.952   | -0.746873406 | NSCL          | HOP-62       | -5.036   | 0.470153279  |
| CNS           | SF-295       | -5.947   | -0.740230247 | Renal         | 786-0        | -5.030   | 0.478125069  |
| Ovarian       | OVCAR-8      | -5.863   | -0.628625180 | Colon         | SW-620       | -5.018   | 0.494068650  |
| Renal         | SN12C        | -5.821   | -0.572822646 | Leukemia      | CCRF-CEM     | -4.948   | 0.587072873  |
| Melanoma      | *M19-MEL     | -5.807   | -0.554221802 | Colon         | COLO205      | -4.917   | 0.628260457  |
| Ovarian       | *SK-OV-3     | -5.765   | -0.498419268 | Colon         | *KM20L2      | -4.911   | 0.636232248  |
| Melanoma      | M14          | -5.648   | -0.342969353 | Leukemia      | SR           | -4.879   | 0.678748464  |
|               |              |          |              | Colon         | HCC-2998     | -4.783   | 0.806297112  |
|               |              |          |              | Melanoma      | UACC-257     | -4.763   | 0.832869747  |
|               |              |          |              | Leukemia      | K-562        | -4.755   | 0.843498801  |
|               |              |          |              | Ovarian       | OVCAR-3      | -4.636   | 1.001605980  |
|               |              |          |              | SCL           | *DMS114      | -4.626   | 1.014892297  |
|               |              |          |              | Leukemia      | MOLT-4       | -4.523   | 1.151741368  |
|               |              |          |              | NSCL          | *HOP-18      | -4.523   | 1.151741368  |
|               |              |          |              | NSCL          | NCI-H322M    | -4.523   | 1.151741368  |
|               |              |          |              | Colon         | *DLD-1       | -4.523   | 1.151741368  |
|               |              |          |              | CNS           | *SNB-78      | -4.523   | 1.151741368  |
|               |              |          |              | CNS           | *XF498       | -4.523   | 1.151741368  |
|               |              |          |              | Melanoma      | SK-MEL-28    | -4.523   | 1.151741368  |
|               |              |          |              | Ovarian       | OVCAR-4      | -4.523   | 1.151741368  |

NSCL: non-small cell lung carcinoma

CNS: central nervous system

SCL: small cell lung carcinoma

\*These cell lines are not included in the GWAS analysis due to missing genotypes and/or other quality-control reasons.
